# Supplementary material
Source: PubMed Central journal article supplement (PMC6200022)
Supplement: Supp_Data.pdf [file Supp_Data.pdf]

Supplemental Tables. Synergy of clofazimine, clarithromycin, amikacin, dapson, rifampin, and tigecycline with various antibiotics against MDR-*M. abscessus* strains isolated from cystic fibrosis patients.

|           | CLA | SXT        | CIP   | MXF   | FOX | AMI | TGC    | LZD | IMI | FEP | AUG    | AXO | MIN | TOB |
|-----------|-----|------------|-------|-------|-----|-----|--------|-----|-----|-----|--------|-----|-----|-----|
| Strain 11 | >16 | >8/152     | >4    | >8    | 64  | 32  | 4      | >32 | 16  | >32 | >64/32 | >64 | >8  | >16 |
| CFZ (0.5) | <1  | <0.25/4.75 | <0.12 | <0.25 | <4  | <1  | <0.015 | <1  | <2  | <1  | <2/1   | <4  | <1  | <1  |
| Strain 12 | >16 | >8/152     | >4    | >8    | 16  | 32  | 1      | >32 | 16  | 16  | 32/16  | >64 | 8   | >16 |
| CFZ (0.5) | <1  | <0.25/4.75 | <0.12 | <0.25 | <4  | <1  | <0.015 | <1  | <2  | <1  | <2/1   | <4  | <1  | <1  |
| Strain 13 | 8   | 8/152      | >4    | >8    | 64  | 32  | 2      | >32 | 16  | 32  | >64/32 | >64 | 8   | >16 |
| CFZ (0.5) | <1  | <0.25/4.75 | <0.12 | <0.25 | <4  | <1  | <0.015 | <1  | <2  | <1  | <2/1   | <4  | <1  | <1  |
| Strain 14 | 4   | >8/152     | >4    | >8    | 128 | 16  | 4      | >32 | 32  | >32 | >64/32 | >64 | >8  | >16 |
| CFZ (0.5) | <1  | <0.25/4.75 | <0.12 | <0.25 | <4  | <1  | <0.015 | <1  | <2  | <1  | <2/1   | <4  | <1  | <1  |
| Strain 16 | 4   | >8/152     | 4     | 8     | 32  | 16  | 0.5    | 16  | 16  | 32  | >64/32 | >64 | >8  | >16 |
| CFZ (0.5) | <1  | <0.25/4.75 | <0.12 | <0.25 | <4  | <1  | <0.015 | <1  | <2  | <1  | <2/1   | <4  | <1  | <1  |
| Strain 17 | >16 | 8/152      | 4     | 8     | 32  | 16  | 1      | 16  | 4   | 16  | 64/32  | >64 | >8  | >16 |
| CFZ (0.5) | <1  | <0.25/4.75 | <0.12 | <0.25 | <4  | <1  | <0.015 | <1  | <2  | <1  | <2/1   | <4  | <1  | <1  |
| Strain 19 | >16 | >8/152     | >4    | >8    | 128 | 32  | >4     | >32 | 64  | >32 | >64/32 | >64 | >8  | >16 |
| CFZ (0.5) | <1  | <0.25/4.75 | <0.12 | <0.25 | <4  | <1  | <0.015 | <1  | <2  | <1  | <2/1   | <4  | <1  | <1  |
| Strain 25 | >16 | >8/152     | >4    | >8    | 64  | 32  | 2      | >32 | 16  | >32 | >64/32 | >64 | >8  | >16 |
| CFZ (0.5) | <1  | <0.25/4.75 | <0.12 | <0.25 | <4  | <1  | <0.015 | <1  | <2  | <1  | <2/1   | <4  | <1  | <1  |
| Strain 26 | 16  | >8/152     | >4    | >8    | 32  | 32  | 1      | >32 | 8   | >32 | >64/32 | >64 | >8  | >16 |
| CFZ (0.5) | <1  | <0.25/4.75 | <0.12 | <0.25 | <4  | <1  | <0.015 | <1  | <2  | <1  | <2/1   | <4  | <1  | <1  |

Table S1. Clofazimine synergy.

Table S2. Amikacin synergy.

|           | CLA   | SXT         | CIP   | MXF   | FOX | TGC    | LZD | IMI | FEP | AUG    | AXO | MIN | TOB |
|-----------|-------|-------------|-------|-------|-----|--------|-----|-----|-----|--------|-----|-----|-----|
| Strain 11 | >16   | >8/152      | >4    | >8    | 64  | 4      | >32 | 16  | >32 | >64/32 | >64 | >8  | >16 |
| AMI (8)   | <1    | <0.25/4.75  | <0.12 | <0.25 | <4  | <0.015 | <1  | <2  | <1  | <2/1   | <4  | <1  | <1  |
| Strain 12 | >16   | >8/152      | >4    | >8    | 16  | 1      | >32 | 16  | 16  | 32/16  | >64 | 8   | >16 |
| AMI (8)   | 0.06  | "0.25/4.75" | 0.12  | 0.25  | 4   | 0.015  | 1   | 2   | 1   | "2/1"  | 4   | 1   | 1   |
| Strain 13 | 8     | 8/152       | >4    | >8    | 64  | 2      | >32 | 16  | 32  | >64/32 | >64 | 8   | >16 |
| AMI (8)   | 0.06  | "0.25/4.75" | 0.12  | 0.25  | 4   | <0.015 | 1   | 2   | 1   | "2/1"  | 4   | 1   | 1   |
| Strain 14 | 4     | >8/152      | >4    | >8    | 128 | 4      | >32 | 32  | >32 | >64/32 | >64 | >8  | >16 |
| AMI (8)   | 0.06  | "0.25/4.75" | 0.12  | 0.25  | 4   | 0.015  | 1   | 2   | 1   | "2/1"  | 4   | 1   | 1   |
| Strain 16 | 4     | >8/152      | 4     | 8     | 32  | 0.5    | 16  | 16  | 32  | >64/32 | >64 | >8  | >16 |
| AMI (8)   | 0.06  | "0.25/4.75" | 0.12  | 0.25  | 4   | 0.015  | 1   | 2   | 1   | "2/1"  | 4   | 1   | 1   |
| Strain 17 | >16   | 8/152       | 4     | 8     | 32  | 1      | 16  | 4   | 16  | 64/32  | >64 | >8  | >16 |
| AMI (8)   | <0.06 | "2/38"      | 4     | >8    | 4   | <0.015 | <1  | <2  | <1  | >64/32 | <4  | <1  | <1  |
| Strain 19 | >16   | >8/152      | >4    | >8    | 128 | >4     | >32 | 64  | >32 | >64/32 | >64 | >8  | >16 |
| AMI (8)   | 0.06  | "0.25/4.75" | 0.12  | 0.25  | 4   | 0.015  | 1   | 2   | 1   | "2/1"  | 4   | 1   | 1   |
| Strain 25 | >16   | >8/152      | >4    | >8    | 64  | 2      | >32 | 16  | >32 | >64/32 | >64 | >8  | >16 |
| AMI (8)   | 0.06  | "0.25/4.75" | 0.12  | 0.25  | 4   | 0.015  | 1   | 2   | 1   | "2/1"  | 4   | 1   | 1   |
| Strain 26 | 16    | >8/152      | >4    | >8    | 32  | 1      | >32 | 8   | >32 | >64/32 | >64 | >8  | >16 |

Table S3. Clarithromycin synergy.

|           | SXT         | CIP   | MXF   | FOX | AMI | TGC    | LZD | IMI | FEP | AUG    | AXO | MIN | TOB |
|-----------|-------------|-------|-------|-----|-----|--------|-----|-----|-----|--------|-----|-----|-----|
| Strain 11 | >8/152      | >4    | >8    | 64  | 32  | 4      | >32 | 16  | >32 | >64/32 | >64 | >8  | >16 |
| CLA(4)    | <0.25/4.75  | <0.12 | <0.25 | <4  | <1  | <0.015 | <1  | <2  | <1  | <2/1   | <4  | <1  | <1  |
| Strain 12 | >8/152      | >4    | >8    | 16  | 32  | 1      | >32 | 16  | 16  | 32/16  | >64 | 8   | >16 |
| CLA(4)    | "0.25/4.75" | 0.12  | 0.25  | 4   | 1   | 0.015  | 1   | 2   | 1   | "2/1"  | 4   | 1   | 1   |
| Strain 13 | 8/152       | >4    | >8    | 64  | 32  | 2      | >32 | 16  | 32  | >64/32 | >64 | 8   | >16 |
| CLA(4)    | "0.25/4.75" | 0.12  | 0.25  | 4   | 1   | 0.015  | 1   | 2   | 1   | "2/1"  | 4   | 1   | 1   |
| Strain 14 | >8/152      | >4    | >8    | 128 | 16  | 4      | >32 | 32  | >32 | >64/32 | >64 | >8  | >16 |
| CLA(4)    | "0.25/4.75" | 0.12  | 0.25  | 4   | 1   | 0.015  | 1   | 2   | 1   | "2/1"  | 4   | 1   | 1   |
| Strain 16 | >8/152      | 4     | 8     | 32  | 16  | 0.5    | 16  | 16  | 32  | >64/32 | >64 | >8  | >16 |
| CLA(4)    | "0.25/4.75" | 0.12  | 0.25  | 4   | 1   | 0.015  | 1   | 2   | 1   | "2/1"  | 4   | 1   | 1   |
| Strain 17 | 8/152       | 4     | 8     | 32  | 16  | 1      | 16  | 4   | 16  | 64/32  | >64 | >8  | >16 |
| CLA(4)    | "2/38"      | 0.25  | >9    | 4   | <1  | <0.015 | <1  | <2  | <1  | >64/32 | <4  | <1  | <1  |
| Strain 19 | >8/152      | >4    | >8    | 128 | 32  | >4     | >32 | 64  | >32 | >64/32 | >64 | >8  | >16 |
| CLA(4)    | "0.25/4.75" | 0.12  | 0.25  | 4   | 1   | 0.015  | 1   | 2   | 1   | "2/1"  | 4   | 1   | 1   |
| Strain 25 | >8/152      | >4    | >8    | 64  | 32  | 2      | >32 | 16  | >32 | >64/32 | >64 | >8  | >16 |
| CLA(4)    | "0.25/4.75" | 0.12  | 0.25  | 4   | 1   | 0.015  | 1   | 2   | 1   | "2/1"  | 4   | 1   | 1   |
| Strain 26 | >8/152      | >4    | >8    | 32  | 32  | 1      | >32 | 8   | >32 | >64/32 | >64 | >8  | >16 |
| CLA(4)    | "0.25/4.75" | 0.12  | 0.25  | 4   | 1   | 0.015  | 1   | 2   | 1   | "2/1"  | 4   | 1   | 1   |

Table S4. Dapsone synergy.

|           | CLA   | SXT         | CIP  | MXF  | FOX  | AMI | TGC    | LZD | IMI | FEP | AUG    | AXO | MIN | TOB |
|-----------|-------|-------------|------|------|------|-----|--------|-----|-----|-----|--------|-----|-----|-----|
| Strain 11 | >16   | >8/152      | >4   | >8   | 64   | 32  | 4      | >32 | 16  | >32 | >64/32 | >64 | >8  | >16 |
| DAP(0.5)  | 2     | 8/152       | 4    | 4    | 64   | 4   | 1      | 32  | 64  | >32 | >64/32 | >64 | >8  | 8   |
| Strain 12 | >16   | >8/152      | >4   | >8   | 16   | 32  | 1      | >32 | 16  | 16  | 32/16  | >64 | 8   | >16 |
| DAP(0.5)  | >16   | >8/152      | >4   | >8   | >128 | >64 | >4     | >32 | >64 | >32 | >64/32 | >64 | >8  | >16 |
| Strain 13 | 8     | 8/152       | >4   | >8   | 64   | 32  | 2      | >32 | 16  | 32  | >64/32 | >64 | 8   | >16 |
| DAP(0.5)  | 2     | >8/152      | 1    | 8    | 64   | 4   | 0.5    | >32 | >64 | >32 | >64/32 | >64 | >8  | >16 |
| Strain 14 | 4     | >8/152      | >4   | >8   | 128  | 16  | 4      | >32 | 32  | >32 | >64/32 | >64 | >8  | >16 |
| DAP(0.5)  | <0.06 | "0.25/4.75" | 0.12 | 0.25 | 4    | 1   | 0.015  | 1   | 2   | 1   | "2/1"  | 4   | 1   | 1   |
| Strain 16 | 4     | >8/152      | 4    | 8    | 32   | 16  | 0.5    | 16  | 16  | 32  | >64/32 | >64 | >8  | >16 |
| DAP(0.5)  | 0.06  | "0.25/4.75" | 0.12 | 0.25 | 4    | 1   | 0.015  | 1   | 2   | 1   | "2/1"  | 4   | 1   | 1   |
| Strain 17 | >16   | 8/152       | 4    | 8    | 32   | 16  | 1      | 16  | 4   | 16  | 64/32  | >64 | >8  | >16 |
| DAP(0.5)  | ND    | "1/19"      | 2    | 1    | 16   | 2   | 0.5    | 32  | 8   | 16  | 64/32  | >64 | >8  | 16  |
| Strain 19 | >16   | >8/152      | >4   | >8   | 128  | 32  | >4     | >32 | 64  | >32 | >64/32 | >64 | >8  | >16 |
| DAP(0.5)  | <0.06 | "0.25/4.75" | 0.12 | 0.25 | 128  | 8   | <0.015 | 32  | 2   | 1   | "2/1"  | 4   | 1   | 1   |
| Strain 25 | >16   | >8/152      | >4   | >8   | 64   | 32  | 2      | >32 | 16  | >32 | >64/32 | >64 | >8  | >16 |
| DAP(0.5)  | 1     | "4/76"      | 2    | 4    | 32   | 4   | 2      | 32  | 8   | 16  | >64/32 | >64 | >8  | 16  |
| Strain 26 | 16    | >8/152      | >4   | >8   | 32   | 32  | 1      | >32 | 8   | >32 | >64/32 | >64 | >8  | >16 |
| DAP(0.5)  | 0.5   | >8/152      | >4   | 4    | 64   | 16  | 1      | ND  | 32  | >32 | >64/32 | >64 | >8  | >16 |

Table S5. Rifampin synergy.

|           | CLA   | SXT         | CIP  | MXF  | FOX | AMI | TGC   | LZD | IMI | FEP | AUG    | AXO | MIN | TOB |
|-----------|-------|-------------|------|------|-----|-----|-------|-----|-----|-----|--------|-----|-----|-----|
| Strain 11 | >16   | >8/152      | >4   | >8   | 64  | 32  | 4     | >32 | 16  | >32 | >64/32 | >64 | >8  | >16 |
| RIF(1)    | 4     | 8/152       | 4    | 8    | 64  | 2   | 1     | 16  | 32  | 32  | >64/32 | >64 | >8  | 8   |
| Strain 12 | >16   | >8/152      | >4   | >8   | 16  | 32  | 1     | >32 | 16  | 16  | 32/16  | >64 | 8   | >16 |
| RIF(1)    | >16   | "4/76"      | >4   | 8    | 128 | 4   | 1     | 4   | 16  | 32  | 64/32  | 32  | >8  | 4   |
| Strain 13 | 8     | 8/152       | >4   | >8   | 64  | 32  | 2     | >32 | 16  | 32  | >64/32 | >64 | 8   | >16 |
| RIF(1)    | 0.25  | 8/152       | >4   | 8    | 64  | 4   | 0.5   | >32 | 4   | 16  | >64/32 | >64 | >8  | 16  |
| Strain 14 | 4     | >8/152      | >4   | >8   | 128 | 16  | 4     | >32 | 32  | >32 | >64/32 | >64 | >8  | >16 |
| RIF(1)    | 1     | >8/152      | >4   | 8    | 128 | 4   | 1     | 32  | 32  | 16  | >64/32 | >64 | >8  | 16  |
| Strain 16 | 4     | >8/152      | 4    | 8    | 32  | 16  | 0.5   | 16  | 16  | 32  | >64/32 | >64 | >8  | >16 |
| RIF(1)    | 0.06  | "0.25/4.75" | 0.12 | 0.25 | 4   | 1   | 0.015 | 1   | 2   | 1   | "2/1"  | 4   | 1   | 1   |
| Strain 17 | >16   | 8/152       | 4    | 8    | 32  | 16  | 1     | 16  | 4   | 16  | 64/32  | >64 | >8  | >16 |
| RIF(1)    | 4     | "2/38"      | 2    | 0.5  | 32  | 2   | 4     | 16  | 2   | 2   | 16/8   | 32  | 8   | 16  |
| Strain 19 | >16   | >8/152      | >4   | >8   | 128 | 32  | >4    | >32 | 64  | >32 | >64/32 | >64 | >8  | >16 |
| RIF(1)    | 2     | 8/152       | >4   | >8   | 128 | 8   | 4     | 32  | >64 | 32  | >64/32 | >64 | >8  | 16  |
| Strain 25 | >16   | >8/152      | >4   | >8   | 64  | 32  | 2     | >32 | 16  | >32 | >64/32 | >64 | >8  | >16 |
| RIF(1)    | 1     | "4/76"      | 2    | 2    | 64  | 2   | 2     | 32  | 8   | 32  | >64/32 | >64 | >8  | 8   |
| Strain 26 | 16    | >8/152      | >4   | >8   | 32  | 32  | 1     | >32 | 8   | >32 | >64/32 | >64 | >8  | >16 |
| RIF(1)    | <0.06 | >8/152      | >4   | 4    | 64  | 16  | 1     | 32  | 16  | 32  | >64/32 | >64 | >8  | >16 |

Table S6. Tigecycline synergy.

|           | CLA  | SXT         | CIP  | MXF  | FOX  | AMI | LZD | IMI | FEP | AUG    | AXO | MIN | TOB |
|-----------|------|-------------|------|------|------|-----|-----|-----|-----|--------|-----|-----|-----|
| Strain 11 | >16  | >8/152      | >4   | >8   | 64   | 32  | >32 | 16  | >32 | >64/32 | >64 | >8  | >16 |
| TGC(0.5)  | 16   | "4/76"      | >4   | >8   | >128 | >64 | >32 | >64 | >32 | >64/32 | >64 | >8  | >16 |
| Strain 12 | >16  | >8/152      | >4   | >8   | 16   | 32  | >32 | 16  | 16  | 32/16  | >64 | 8   | >16 |
| TGC(0.5)  | >16  | >8/152      | 4    | >8   | >128 | 8   | 32  | 64  | 32  | 64/32  | >64 | >8  | 16  |
| Strain 13 | 8    | 8/152       | >4   | >8   | 64   | 32  | >32 | 16  | 32  | >64/32 | >64 | 8   | >16 |
| TGC(0.5)  | 0.25 | "4/76"      | 2    | 8    | 64   | 8   | 32  | 64  | 32  | >64/32 | >64 | 8   | 16  |
| Strain 14 | 4    | >8/152      | >4   | >8   | 128  | 16  | >32 | 32  | >32 | >64/32 | >64 | >8  | >16 |
| TGC(0.5)  | 1    | "4/76"      | >4   | 8    | 128  | 8   | >32 | 16  | >32 | >64/32 | >64 | >8  | 16  |
| Strain 16 | 4    | >8/152      | 4    | 8    | 32   | 16  | 16  | 16  | 32  | >64/32 | >64 | >8  | >16 |
| TGC(0.5)  | 0.06 | "0.25/4.75" | 0.12 | 0.25 | 4    | 1   | 1   | 2   | 1   | "2/1"  | 4   | 1   | 1   |
| Strain 17 | >16  | 8/152       | 4    | 8    | 32   | 16  | 16  | 4   | 16  | 64/32  | >64 | >8  | >16 |
| TGC(0.5)  | 16   | ".5/9.5"    | 0.5  | 4    | 64   | 4   | >32 | >64 | 16  | 64/32  | 64  | 8   | 16  |
| Strain 19 | >16  | >8/152      | >4   | >8   | 128  | 32  | >32 | 64  | >32 | >64/32 | >64 | >8  | >16 |
| TGC(0.5)  | 1    | "2/38"      | 2    | 4    | 128  | 8   | 16  | 64  | >32 | >64/32 | >64 | >8  | 16  |
| Strain 25 | >16  | >8/152      | >4   | >8   | 64   | 32  | >32 | 16  | >32 | >64/32 | >64 | >8  | >16 |
| TGC(0.5)  | 0.5  | "4/76"      | 2    | 4    | 64   | 4   | 32  | 4   | 16  | >64/32 | >64 | >8  | 16  |
| Strain 26 | 16   | >8/152      | >4   | >8   | 32   | 32  | >32 | 8   | >32 | >64/32 | >64 | >8  | >16 |
| TGC(0.5)  | 0.5  | >8/152      | >4   | >8   | 64   | 16  | 32  | 64  | >32 | >64/32 | >64 | >8  | >16 |

Abbreviations for all Tables: CLA, Clarithromycin; SXT, trimethoprim/sulfamethoxazole; CIP, ciprofloxacin; MXF, moxifloxacin; FOX, ceftiofur; AMI, amikacin; TGC, tigecycline; LZD, linezolid; IMI, imipenem; FEP, cefepime; AUG, augmentin; AXO, ceftriaxone; MIN, minocycline; CFZ, clofazimine; TOB, tobramycin; CFZ, clofazimine; RIF, rifampin; DAP, dapsone. A total of 14 antibiotic combinations were performed using clofazimine, dapsone, and rifampin, and a total of 13 combinations was done using clarithromycin, amikacin, and tigecycline. Static concentrations of the following antibiotics were used in synergy testing in combination with varying concentrations of other drugs: clofazimine, dapsone and tigecycline, 0.5 µg/ml; clarithromycin, 4 µg/ml; rifampin, 1 µg/ml, and amikacin 8 µg/ml.
